# Supplementary material for: Constructing α-AlH3@polymer composites with high safety and excellent stability properties via in situ polymerization
Source: Royal Society of Chemistry journal article supplement (doi:10.1039/d2nj04702k), 2022-01-01
Supplement: d2nj04702k1.pdf [file d2nj04702k1.pdf]

## Supplementary Material

### **Construct the $\alpha$ -AlH<sub>3</sub>@Polymers Composite with High Safety and Excellent Stability Properties via In-situ Polymerization**

Zhe Shi<sup>a</sup>, Taojie Lu<sup>a</sup>, Yidong Xu<sup>a</sup>, Fei Shang<sup>a</sup>, Yinghui Hu<sup>a</sup>, Zhuo Wu<sup>ab</sup>, Jian Zhang<sup>a\*</sup>,  
Zhaoyang Zhu<sup>b\*</sup>, Jian Zheng<sup>c</sup>, Kaifeng Lin<sup>a</sup> and Yulin Yang<sup>a\*</sup>

<sup>a</sup>MIIT Key Laboratory of Critical Materials Technology for New Energy Conversion  
and Storage, School of Chemical Engineering and Chemistry, Harbin Institute of  
Technology, Harbin 15001, PR China

<sup>b</sup>Science and Technology on Aerospace Chemical Power Laboratory, No. 58, Qinghe  
Road, Xiangyang 441003, PR China

<sup>c</sup>China Aerospace Science and Technology Corporation, 16 Fucheng Road, Haidian  
District, Beijing 100048, PR China

E-mail addresses: zhaji@hit.edu.cn (J. Zhang), zhuzhaoyang1101@163.com (Z. Y.  
Zhu), ylyang@hit.edu.cn (Y.L. Yang).

## Table of Contents

|                                                                                                                                                         |            |
|---------------------------------------------------------------------------------------------------------------------------------------------------------|------------|
| <b>Section 1. The FT-IR spectra of Polystyrene, Polymethyl acrylate, and Polyvinylpyrrolidone.....</b>                                                  | <b>S-3</b> |
| <b>Section 2. The XPS full spectrum of the <math>\alpha</math>-AlH<sub>3</sub>@Polymers composites.....</b>                                             | <b>S-4</b> |
| <b>Section 3. SEM image and EDS mapping of the <math>\alpha</math>-AlH<sub>3</sub> and <math>\alpha</math>-AlH<sub>3</sub>@Polymers composites.....</b> | <b>S-5</b> |
| <b>Section 4. TG curves of the <math>\alpha</math>-AlH<sub>3</sub> and <math>\alpha</math>-AlH<sub>3</sub>@Polymers composites.....</b>                 | <b>S-7</b> |
| <b>Section 5. DSC curves of the <math>\alpha</math>-AlH<sub>3</sub> and <math>\alpha</math>-AlH<sub>3</sub>@Polymers composites.....</b>                | <b>S-8</b> |

**Section 1. The FT-IR spectra of Polystyrene, Polymethyl acrylate, and Polyvinylpyrrolidone.**

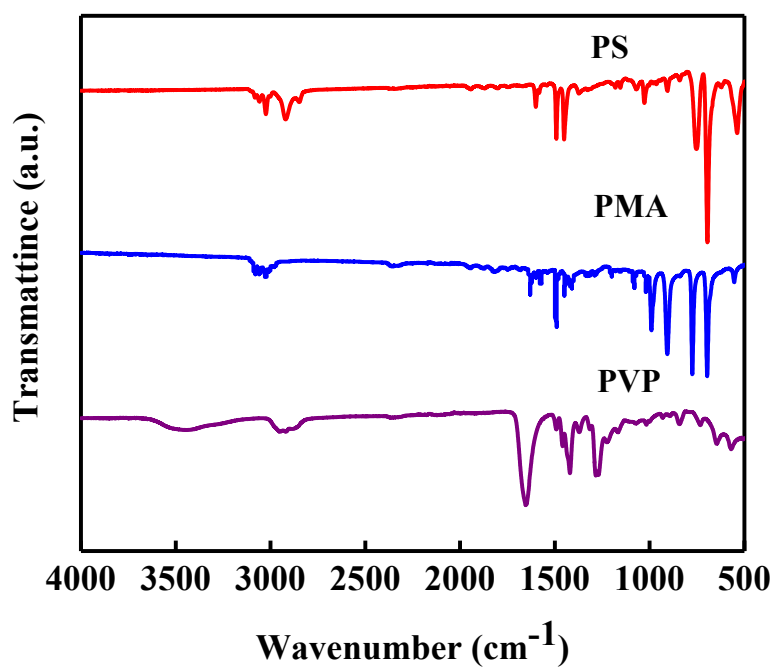

**Fig S1.** The FT-IR spectra of Polystyrene (PS), Polymethyl acrylate (PMA), and Polyvinylpyrrolidone (PVP).

**Section 2. The XPS full spectrum of the  $\alpha$ -AlH<sub>3</sub>@Polymers composites.**

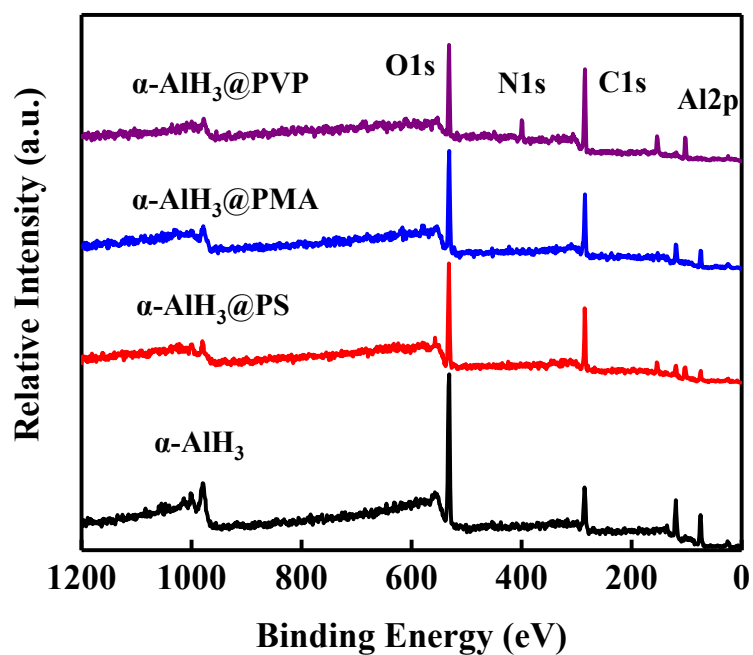

**Fig S2.** The XPS full spectrum of the  $\alpha$ -AlH<sub>3</sub>@Polymers composites.

**Section 3. SEM image and EDS mapping of the  $\alpha$ -AlH<sub>3</sub> and  $\alpha$ -AlH<sub>3</sub>@Polymers composites.**

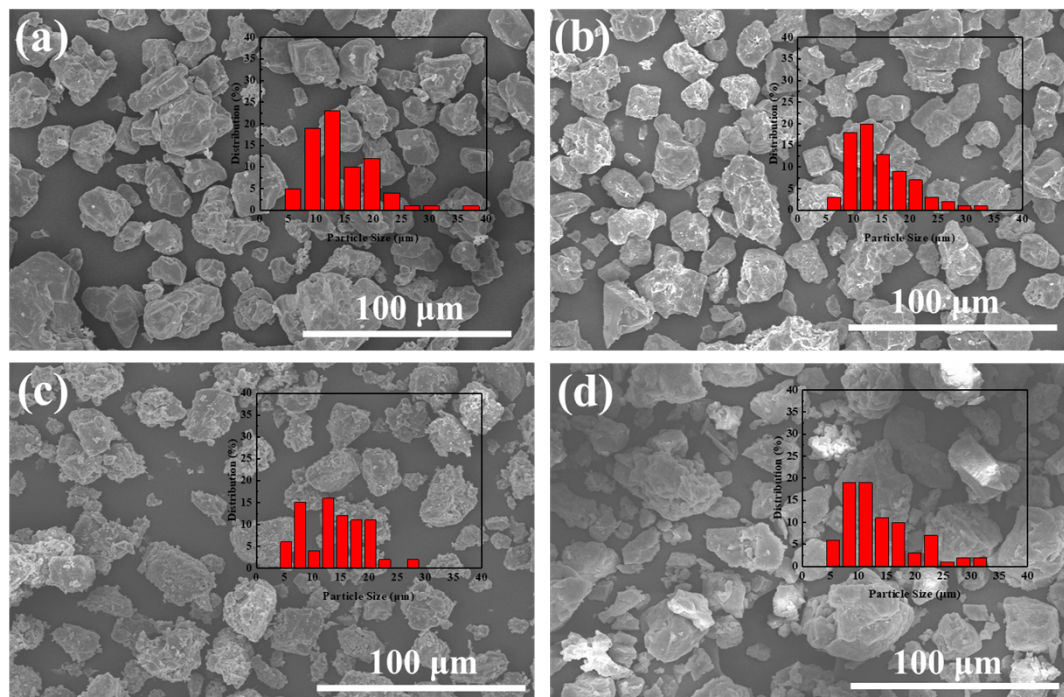

**Fig S3.** SEM image and size distribution of the  $\alpha$ -AlH<sub>3</sub>(a),  $\alpha$ -AlH<sub>3</sub>@PS(b),  $\alpha$ -AlH<sub>3</sub>@PMA(c), and  $\alpha$ -AlH<sub>3</sub>@PVP composites.

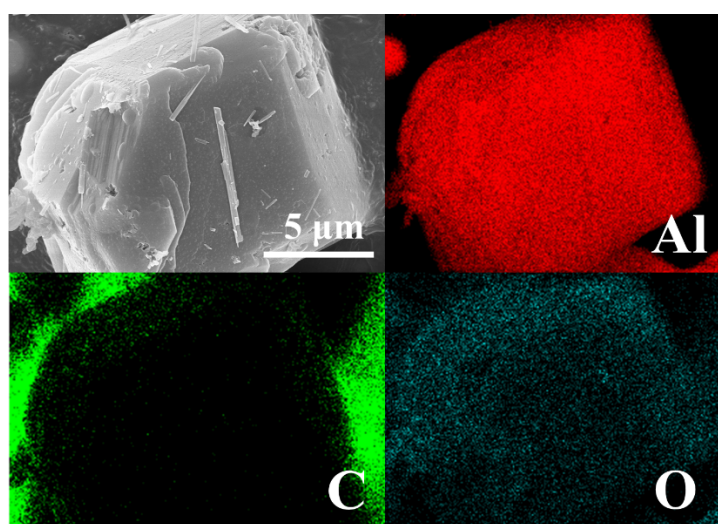

**Fig S4.** EDS mapping of  $\alpha$ -AlH<sub>3</sub>.

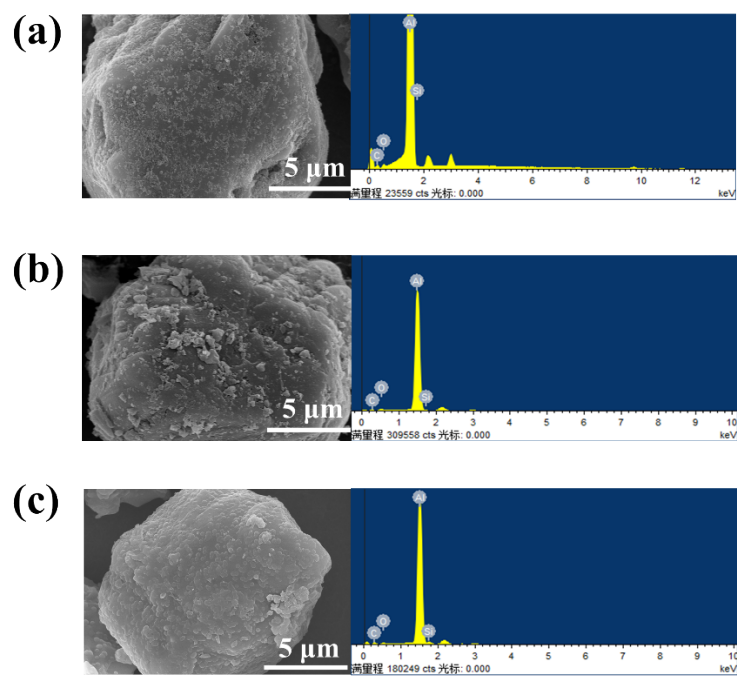

**Fig S5.** EDS analysis of  $\alpha\text{-AlH}_3\text{@PS}$ (a),  $\alpha\text{-AlH}_3\text{@PMA}$ (b), and  $\alpha\text{-AlH}_3\text{@PVP}$ (c) surface element content.

#### Section 4. TG curves of the $\alpha$ -AlH<sub>3</sub> and $\alpha$ -AlH<sub>3</sub>@Polymers composites.

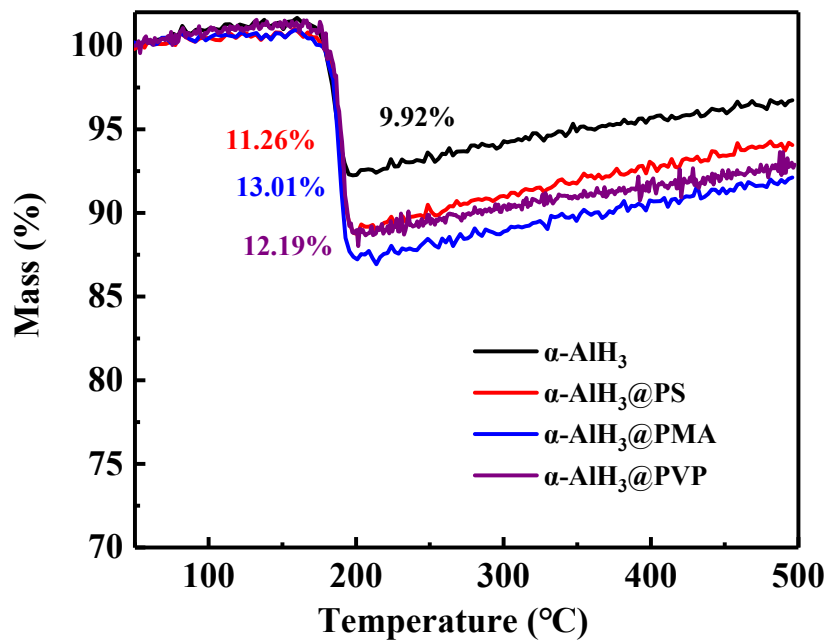

**Fig S6.** TG curves of the  $\alpha$ -AlH<sub>3</sub> and  $\alpha$ -AlH<sub>3</sub>@Polymers composites at 10.0 °C/min heating rates.

**Section 5. DSC curves of the  $\alpha$ -AlH<sub>3</sub> and  $\alpha$ -AlH<sub>3</sub>@Polymers composites.**

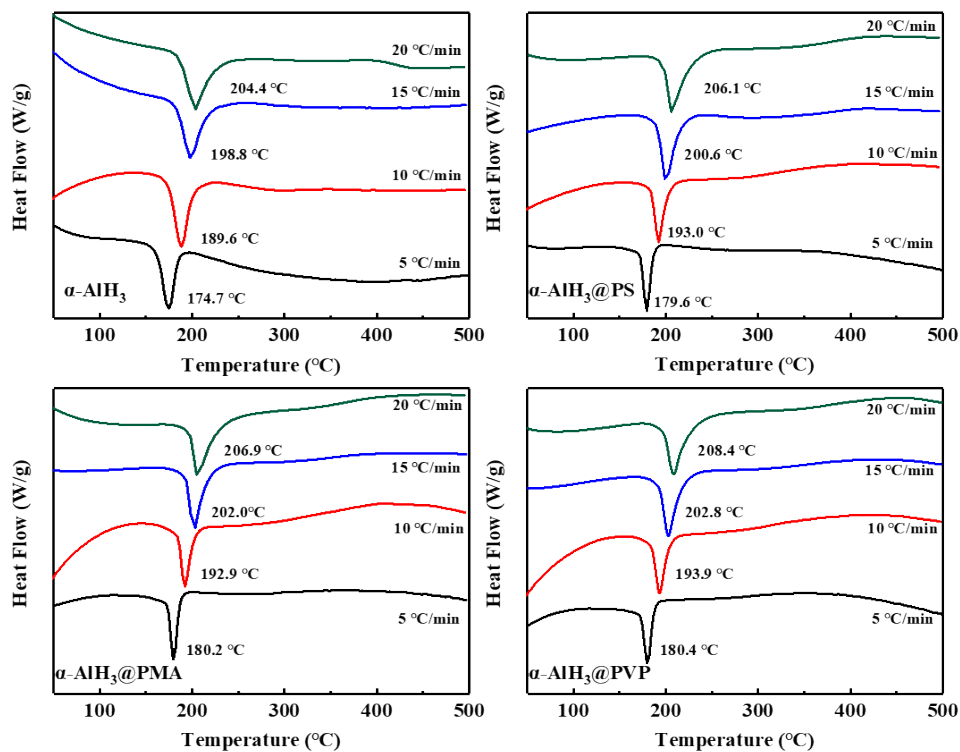

**Fig S7.** DSC curves of the  $\alpha$ -AlH<sub>3</sub> and  $\alpha$ -AlH<sub>3</sub>@Polymers composites at different heating rates (5.0, 10.0, 15.0, and 20.0 °C/min).
